# Supplementary material
Source: Springer Nature journal article supplement (https://www.springermedizin.de/resource/supplementary/12913_2013_3757_MOESM1_ESM.pdf/9532460)
Supplement: MOESM1 [file 9532460]

Cancer patients eligible for performance status assessment (n=963)

Died before assessment (n=6)

Patients' performance screened (n=957)

Not meeting inclusion criteria (n=684)

- KPS\* >70 (n=547)
- Terminal (n=3)
- Missing information about diagnosis (n=1)
- Receiving occupational therapy from the occupational therapy department (n=13)
- Not relevant for other reasons (n=120)

Fulfilled inclusion criteria (n=273)

Declined to participate (n=155)

- Lack of mental resources (n=57)
- Lack of interest (n=98)

Agreed to participate, completed baseline questionnaire and underwent randomisation (n=118)

Intervention group (n=63)

• Occupational therapy-based intervention

Died (n=24)

Withdrew (n=9)

Completed questionnaire after 2 weeks (n=30)

Died (n=9)

Withdrew (n=1)

Completed questionnaire after 8 weeks (n=20)

Control group (n=55)

• Standard treatment and care

Died (n=18)

Withdrew (n=9)

Completed questionnaire after 2 weeks (n=28)

Died (n=6)

Withdrew (n=1)

Completed questionnaire after 8 weeks (n=21)
